# Supplementary material
Source: PubMed Central journal article supplement (PMC6436014)

## Supplementary Information for

### *NPM1* Mutations define a Specific subgroup of MDS and MDS/MPN patients with improved Outcomes with Intensive Chemotherapy

#### Table of Contents

| Content                                                                                                                  | Page |
|--------------------------------------------------------------------------------------------------------------------------|------|
| Supplementary Methods                                                                                                    |      |
| Flow cytometry analysis of bone marrow HSPC populations                                                                  | 2    |
| PCR-based NGS 53-gene panel                                                                                              | 3    |
| PCR-based NGS 28-gene panel                                                                                              | 4    |
| PCR-based NGS 81-gene panel                                                                                              | 6    |
| Supplementary Tables                                                                                                     |      |
| Table S1. Characteristics of patients with <i>NPM1<sub>mut</sub></i> MDS and MDS/MPN                                     | 8    |
| Table S2. Characteristics of patients with <i>NPM1<sub>mut</sub></i> compared to <i>NPM1<sub>wt</sub></i> MDS or MDS/MPN | 10   |
| Table S3. Univariate analysis for survival based on mutations                                                            | 11   |
| Supplementary Figures                                                                                                    |      |
| Figure S1. Changes in bone marrow blast percentage between pre-treatment bone marrow aspirations                         | 12   |
| Figure S2. Kaplan-Meier survival estimate for overall survival                                                           | 13   |
| Figure S3. Kaplan-Meier survival estimates for progression-free survival                                                 | 14   |
| Figure S4. Morphologic and immunophenotypic features of <i>NPM1</i> mutated MDS                                          | 15   |
| Figure S5. Kaplan-Meier survival estimate curves for leukemia-free survival based on therapy                             | 16   |
| Figure S6. Kaplan-Meier survival estimate for overall survival based on IPSS-R category.                                 | 17   |
| Figure S7. Kaplan-Meier survival estimate for time to transformation based on IPSS-R category.                           | 18   |

## Flow cytometry analysis of bone marrow HSPC populations

BM mononuclear cells (MNC) were isolated using the standard gradient separation approach with Ficoll-Paque PLUS (GE Healthcare Lifesciences, Pittsburgh, PA). Quantitative flow cytometry analyses of live MNC or CD34<sup>+</sup> cells was performed using previously described staining protocols (Will et al., 2012; Woll et al., 2014). Cells were acquired with BD Influx Cell Sorter (BD Biosciences), and population analysis was performed using FlowJo software.

See table for details on the antigen panels used for the identification of specific cell populations.

*Table. Cell surface marker expression panel used for the identification and purification of human HSPC by flow cytometry*

| Population                                 | Gating strategy                                                                                                                                                                                                                              |
|--------------------------------------------|----------------------------------------------------------------------------------------------------------------------------------------------------------------------------------------------------------------------------------------------|
| Live cells                                 | Single cells/Sytox™ Green Nucleic Acid Stain (ThermoFisher Scientific, Waltham, MA) negative                                                                                                                                                 |
| Lineage negative cells (Lin <sup>-</sup> ) | CD2 <sup>-</sup> , CD3 <sup>-</sup> , CD4 <sup>-</sup> , CD7 <sup>-</sup> , CD10 <sup>-</sup> , CD11b <sup>-</sup> , CD14 <sup>-</sup> , CD19 <sup>-</sup> , CD20 <sup>-</sup> , CD33 <sup>-</sup> , CD56 <sup>-</sup> , CD235a <sup>-</sup> |
| HSC compartment                            | Live/Lin <sup>-</sup> /CD34 <sup>+</sup> , CD38 <sup>-</sup>                                                                                                                                                                                 |
| LT-HSC                                     | Live/Lin <sup>-</sup> /CD34 <sup>+</sup> , CD38 <sup>-</sup> /CD90 <sup>+</sup> , CD45RA <sup>-</sup>                                                                                                                                        |
| MPP                                        | Live/Lin <sup>-</sup> /CD34 <sup>+</sup> , CD38 <sup>-</sup> /CD90 <sup>-</sup> , CD45RA <sup>-</sup>                                                                                                                                        |
| LMPP                                       | Live/Lin <sup>-</sup> /CD34 <sup>+</sup> , CD38 <sup>-</sup> /CD90 <sup>-</sup> , CD45RA <sup>+</sup>                                                                                                                                        |
| HPC compartment                            | Live/Lin <sup>-</sup> /CD34 <sup>+</sup> , CD38 <sup>+</sup>                                                                                                                                                                                 |
| CMP                                        | Live/Lin <sup>-</sup> /CD34 <sup>+</sup> , CD38 <sup>+</sup> /CD123 <sup>+</sup> , CD45RA <sup>-</sup>                                                                                                                                       |
| GMP                                        | Live/Lin <sup>-</sup> /CD34 <sup>+</sup> , CD38 <sup>+</sup> /CD123 <sup>+</sup> , CD45RA <sup>+</sup>                                                                                                                                       |
| MEP                                        | Live/Lin <sup>-</sup> /CD34 <sup>+</sup> , CD38 <sup>+</sup> /CD123 <sup>-</sup> , CD45RA <sup>-</sup>                                                                                                                                       |

### Abbreviations:

*HSC = Hematopoietic Stem Cell*

*LT-HSC = Long-term HSC*

*MPP = Multipotent Progenitors*

*LMPP = Lymphoid-primed MPP*

*HPC = Hematopoietic Progenitor Cell*

*CMP = Common Myeloid Progenitor*

*GMP = Granulocytic-Monocytic Progenitor*

*MEP = Megakaryocytic-Erythroid Progenitor*

## PCR-based next generation sequencing (NGS) 53-Gene panel

### Exons (codons) tested

**ABL1** 4 (243-274), 5 (275-303), 6 (303-321), 6 (321-362), 7 (395-424)  
**AKT1** 3 (16-49)  
**ALK** 23 (1172-1175), 25 (1248-1275)  
**APC** 16 (875-918), 16 (1113-1153), 16 (1257-1297), 16 (1288-1328), 16 (1318-1357), 16 (1349-1386), 16 (1377-1416), 16 (1416-1456), 16 (1456-1494), 16 (1493-1530), 16 (1530-1575)  
**ATM** 8 (353-355), 9 (409-412), 12 (601-633), 17 (846-880), 26 (1308-1331), 34 (1678-1719), 35 (1741-1773), 36 (1792-1832), 39 (1940-1973), 50 (2441-2479), 54 (2665-2670), 55 (2694-2717), 56 (2725-2756), 59 (2889-2891), 61 (2946-2950), 63 (3007-3051)  
**BRAF** 11 (439-471), 15 (581-606)  
**CDH1** 3 (77-117), 8 (369-379), 9 (399-439)  
**CSF1R** 7 (297-301), 22 (926-970)  
**CTNNB1** 3 (12-50)  
**DNMT3A** 23 (866-913)  
**EGFR** 3 (108-142), 7 (288-297), 15 (598-627), 18 (708-728), 19 (729-761), 20 (762-775), 20 (775-817), 21 (857-875)  
**ERBB2** 19 (754-769), 20 (772-818), 21 (839-883)  
**ERBB4** 3 (98-140), 4 (153-186), 6 (208-244), 7 (248-287), 8 (295-306), 9 (333-350), 15 (579-619), 23 (907-936)  
**EZH2** 16 (613-644)  
**FBXW7** 5 (243-278), 8 (375-394), 9 (429-471), 10 (473-508), 11 (549-583)  
**FGFR1** 4 (120-126), 7 (247-250)  
**FGFR2** 7 (250-273), 7 (273-311), 7 (302-313), 9 (362-382), 12 (521-550)  
**FGFR3** 7 (247-288), 9 (379-422), 14 (639-653), 15 (654-659), 18 (792-807)  
**FLT3** 11 (437-456), 14 (569-605), 16 (648-683), 20 (807-843)  
**GNA11** 4 (172-202), 6 (255-297), 7 (297-304), 7 (304-349)  
**GNAQ** 4 (159-202), 5 (202-210), 5 (210-245), 5 (241-245), 6 (246-263), 6 (263-297), 6 (291-297), 7 (297-324), 7 (324-360), 7 (355-360)  
**GNAS** 8 (200-220)  
**HNF1A** 3 (205-238), 4 (271-314)  
**HRAS** 2 (1-15), 3 (38-63)  
**IDH1** 4 (90-132)  
**IDH2** 4 (125-178)  
**JAK2** 14 (615-622)  
**JAK3** 13 (568-573), 16 (683-723)  
**KDR** 6 (220-248), 7 (267-276), 11 (471-476), 19 (872-874), 21 (946-985), 26 (1135-1146), 27 (1171-1211), 30 (1308-1352), 30 (1352-1357)  
**KIT** 2 (51-93), 9 (502-514), 10 (514-547), 10 (540-549), 11 (550-550), 11 (550-592), 13 (641-664), 14 (670-712), 15 (714-745), 17 (815-828), 18 (838-866)  
**KLHL6** 1 (1-13), 1 (13-73), 1 (73-98)  
**KRAS** 2 (1-22), 3 (38-63), 4 (103-147)  
**MET** 2 (168-209), 2 (375-400), 14 (1008-1028), 16 (1110-1132), 19 (1247-1284)  
**MLH1** 12 (383-426)  
**MPL** 10 (514-522)  
**NOTCH1** 26 (1562-1601), 27 (1673-1679)  
**NPM1** 11 (283-295)  
**NRAS** 2 (1-18), 3 (38-62)  
**PDGFRA** 12 (552-592), 14 (659-668), 15 (673-717), 18 (823-854)  
**PIK3CA** 2 (83-118), 5 (345-353), 8 (418-445), 10 (538-555), 14 (701-729), 21 (988-1027), 21 (1027-1069)  
**PTEN** 1 (5-27), 3 (67-70), 6 (170-210), 7 (212-221), 7 (221-266), 8 (287-332), 8 (332-342)  
**PTPN11** 3 (59-104), 13 (501-533)  
**RB1** 4 (127-158), 6 (199-203), 11 (357-376), 18 (570-605), 20 (659-700), 21 (703-733), 22 (746-775)  
**RET** 10 (610-627), 11 (628-667), 13 (766-798), 15 (880-910), 16 (918-934)  
**SMAD4** 3 (119-142), 5 (167-208), 6 (243-263), 8 (310-319), 9 (329-373), 10 (385-424), 11 (443-480), 12 (496-535)  
**SMARCB1** 2 (39-78), 4 (156-167), 5 (199-210), 9 (381-386)  
**SMO** 3 (197-242), 5 (323-366), 6 (403-422)  
**STK11** 6 (261-288), 8 (332-370)  
**TP53** 2 (1-12), 4 (69-112), 5 (126-147), 5 (147-186), 5 (181-187), 6 (187-192), 6 (187-223), 6 (214-224), 7 (225-253), 8 (267-306), 10 (332-342)  
**VHL** 1 (88-114), 2 (129-155), 3 (157-200)  
**XPO1** 14 (501-522), 15 (523-539), 15 (539-575)  
Coverage by gene and codon(s) tested for indeterminate amplicons  
**CDKN2A** 2 (51-70)  
**FGFR3** 16 (692-723)  
**GNA11** 4 (159-172), 5 (202-216), 7 (349-360)  
**NOTCH1** 34 (2467-2526)  
**RB1** 17 (550-565)  
**SMO** 9 (533-551), 11 (639-646)  
**SRC** 14 (530-537)  
**STK11** 1 (36-77), 4 (193-199), 5 (200-211)

## PCR-based next generation sequencing (NGS) 28-Gene panel

| <b>Gene</b>   | <b>Exons (codons) tested</b>                                                                                                                                                                                                                                                                                                                                                                                                                                                                                                                                                                                                                                                                                                                                                                                                                      |
|---------------|---------------------------------------------------------------------------------------------------------------------------------------------------------------------------------------------------------------------------------------------------------------------------------------------------------------------------------------------------------------------------------------------------------------------------------------------------------------------------------------------------------------------------------------------------------------------------------------------------------------------------------------------------------------------------------------------------------------------------------------------------------------------------------------------------------------------------------------------------|
| <b>ABL1</b>   | 1 (1-27), 2 (27-41), 2 (41-85), 3 (85-99), 3 (92-129), 3 (128-167), 3 (167-183), 4 (184-200), 4 (195-235), 4 (235-274), 5 (275-303), 6 (303-317), 6 (307-347), 6 (347-362), 7 (362-382), 7 (382-424), 8 (424-444), 8 (444-475), 9 (475-489), 9 (489-505), 10 (505-523), 11 (560-576), 11 (567-606), 11 (598-638), 11 (661-700), 11 (691-731), 11 (723-762), 11 (752-790), 11 (781-820), 11 (810-851), 11 (843-882), 11 (873-912), 11 (904-944), 11 (935-975), 11 (965-1003), 11 (995-1034), 11 (1070-1112), 11 (1112-1131)                                                                                                                                                                                                                                                                                                                        |
| <b>ASXL1</b>  | 2 (20-33), 2 (33-47), 3 (47-62), 3 (62-84), 4 (85-104), 4 (96-125), 5 (125-148), 5 (148-157), 6 (158-171), 6 (171-189), 7 (189-206), 7 (206-240), 8 (240-253), 8 (250-288), 8 (287-294), 9 (295-296), 9 (296-327), 10 (327-341), 10 (341-362), 11 (362-377), 11 (368-407), 11 (398-437), 11 (427-468), 11 (468-508), 11 (508-545), 11 (545-573), 12 (574-589), 12 (581-619), 12 (610-649), 12 (640-678), 12 (670-709), 12 (701-740), 12 (732-771), 12 (762-801), 12 (792-831), 12 (821-860), 12 (851-889), 12 (880-919), 12 (911-949), 12 (940-979), 12 (970-1009), 12 (999-1038), 12 (1031-1069), 12 (1061-1100), 12 (1091-1129), 12 (1123-1160), 12 (1153-1191), 12 (1182-1221), 12 (1212-1251), 12 (1241-1281), 12 (1271-1311), 12 (1301-1341), 12 (1336-1375), 12 (1369-1409), 12 (1408-1448), 12 (1448-1486), 12 (1486-1529), 12 (1529-1542) |
| <b>BRAF</b>   | 2 (47-73), 2 (73-80), 3 (81-119), 3 (119-157), 3 (147-168), 4 (169-187), 4 (187-203), 5 (203-234), 5 (234-237), 6 (238-273), 6 (273-287), 7 (287-311), 7 (311-327), 8 (327-351), 8 (351-380), 9 (381-386), 10 (393-425), 10 (425-438), 11 (439-465), 12 (478-493), 12 (493-506), 13 (506-518), 13 (518-555), 13 (555-565), 14 (565-581), 15 (581-619), 15 (619-620), 16 (621-654), 16 (654-664), 17 (665-697), 17 (697-709), 18 (710-729), 18 (729-767)                                                                                                                                                                                                                                                                                                                                                                                           |
| <b>DNMT3A</b> | 2 (1-24), 3 (25-42), 3 (42-59), 4 (89-133), 4 (132-150), 5 (150-164), 7 (214-228), 7 (228-268), 7 (268-285), 8 (286-322), 8 (322-338), 9 (339-353), 9 (353-374), 10 (375-402), 10 (402-427), 11 (427-443), 11 (443-477), 12 (477-486), 12 (477-492), 13 (492-518), 14 (519-538), 14 (538-556), 15 (556-583), 15 (583-617), 16 (631-646), 17 (646-679), 17 (679-694), 18 (695-720), 18 (720-725), 19 (725-739), 19 (729-768), 19 (759-774), 20 (775-803), 22 (827-851), 22 (851-866), 23 (866-900), 23 (900-913)                                                                                                                                                                                                                                                                                                                                   |
| <b>EGFR</b>   | 2 (30-42), 2 (42-80), 3 (81-96), 3 (89-128), 3 (128-142), 4 (142-158), 4 (158-187), 5 (187-210), 6 (210-234), 7 (250-273), 7 (273-297), 8 (297-317), 8 (317-336), 9 (336-353), 9 (343-378), 9 (377-378), 10 (378-385), 10 (385-403), 11 (403-433), 12 (433-444), 12 (438-478), 12 (478-500), 13 (521-544), 14 (544-559), 14 (559-574), 15 (575-591), 15 (591-627), 16 (627-640), 17 (640-659), 17 (659-687), 18 (688-702), 18 (702-728), 19 (729-743), 19 (743-761), 20 (762-784), 20 (784-823), 21 (824-849), 21 (849-875), 22 (876-901), 23 (901-916), 23 (916-950), 24 (950-982), 25 (983-998), 25 (998-1038), 26 (1039-1054), 27 (1055-1070), 27 (1070-1091), 28 (1091-1104), 28 (1096-1133), 28 (1171-1211)                                                                                                                                  |
| <b>EZH2</b>   | 2 (1-18), 2 (18-39), 3 (40-69), 3 (69-82), 4 (83-114), 4 (114-121), 5 (122-139), 5 (139-162), 6 (162-196), 6 (196-209), 7 (209-227), 7 (227-243), 8 (243-283), 8 (283-303), 9 (303-321), 9 (321-333), 10 (334-364), 10 (364-404), 10 (395-414), 11 (414-429), 11 (429-466), 11 (460-470), 12 (471-487), 12 (487-502), 13 (502-516), 14 (516-529), 14 (529-558), 15 (558-569), 15 (569-610), 15 (606-617), 16 (618-634), 16 (634-649), 17 (650-677), 18 (677-704), 19 (704-728), 19 (719-732), 20 (732-752)                                                                                                                                                                                                                                                                                                                                        |
| <b>FLT3</b>   | 2 (15-43), 2 (43-55), 3 (56-71), 3 (71-112), 3 (103-123), 4 (123-147), 4 (147-162), 5 (162-189), 5 (189-205), 6 (205-234), 6 (234-248), 7 (248-272), 7 (272-294), 8 (295-311), 8 (301-340), 8 (331-346), 9 (346-382), 9 (382-402), 10 (402-437), 11 (437-463), 11 (463-473), 12 (473-514), 12 (514-533), 13 (533-563), 13 (563-568), 14 (569-573), 14 (573-610), 14 (606-613), 15 (613-614), 15 (613-642), 15 (635-648), 16 (648-668), 16 (668-685), 17 (685-723), 17 (723-736), 18 (736-764), 19 (764-805), 19 (805-806), 20 (807-832), 20 (832-847), 21 (848-862), 21 (862-885), 22 (885-892), 22 (892-918), 23 (918-933), 23 (933-953), 24 (954-976), 24 (976-994)                                                                                                                                                                             |
| <b>GATA1</b>  | 2 (1-16), 2 (13-51), 2 (51-74), 3 (74-89), 3 (81-120), 3 (111-151), 3 (142-182), 4 (200-227), 4 (227-248), 5 (249-265), 5 (265-290), 6 (291-306), 6 (297-336)                                                                                                                                                                                                                                                                                                                                                                                                                                                                                                                                                                                                                                                                                     |
| <b>GATA2</b>  | 2 (1-20), 3 (77-96), 3 (96-140), 3 (181-220), 3 (242-280), 3 (273-291), 4 (318-339), 5 (340-358), 5 (358-381), 6 (399-439), 6 (434-474), 6 (466-481)                                                                                                                                                                                                                                                                                                                                                                                                                                                                                                                                                                                                                                                                                              |
| <b>HRAS</b>   | 2 (18-37), 3 (38-63), 3 (63-97), 4 (97-129), 5 (151-190)                                                                                                                                                                                                                                                                                                                                                                                                                                                                                                                                                                                                                                                                                                                                                                                          |
| <b>IDH1</b>   | 3 (1-13), 4 (41-59), 4 (59-100), 4 (92-131), 4 (121-138), 5 (139-172), 5 (172-174), 6 (174-191), 6 (191-228), 6 (223-233), 7 (233-266), 7 (266-284), 8 (284-317), 8 (317-331), 9 (331-370), 9 (370-385), 10 (385-404), 10 (404-415)                                                                                                                                                                                                                                                                                                                                                                                                                                                                                                                                                                                                               |
| <b>IDH2</b>   | 1 (1-39), 2 (39-69), 3 (106-125), 4 (125-167), 4 (167-178), 5 (179-181), 5 (181-220), 5 (212-226), 6 (227-262), 6 (262-272), 7 (272-281), 7 (278-317), 7 (308-323), 9 (361-370), 9 (370-393), 10 (393-417), 10 (408-424), 11 (424-453)                                                                                                                                                                                                                                                                                                                                                                                                                                                                                                                                                                                                            |
| <b>IKZF2</b>  | 2 (1-12), 3 (12-23), 3 (23-47), 4 (47-60), 4 (60-99), 4 (91-129), 4 (121-136), 5 (136-178), 5 (178-192), 6 (192-223), 6 (223-238), 7 (238-270), 7 (270-286), 8 (286-312), 8 (312-351), 8 (351-393), 8 (393-432), 8 (424-463), 8 (454-494), 8 (484-524), 8 (514-527)                                                                                                                                                                                                                                                                                                                                                                                                                                                                                                                                                                               |
| <b>JAK2</b>   | 3 (11-48), 3 (48-76), 4 (76-92), 4 (92-117), 5 (117-137), 5 (137-156), 6 (157-185), 6 (185-205), 7 (205-220), 7 (241-281), 7 (281-312), 8 (313-328), 8 (328-352), 9 (353-364), 9 (359-398), 9 (398-405), 10 (405-418), 10 (418-442), 11 (443-456), 11 (451-488), 11 (488-505), 12 (505-515), 12 (515-547), 13 (548-569), 13 (569-592), 14 (593-607), 14 (607-622), 15 (622-627), 15 (627-664), 16 (665-676), 16 (676-711), 17 (711-723), 17 (747-761), 18 (762-777), 18 (777-812), 19 (812-831), 19 (831-857), 20 (858-893), 20 (893-921), 21 (921-949), 21 (939-962), 22 (963-981), 22 (981-1020), 23 (1020-1039), 23 (1039-1059), 24 (1060-1079), 24 (1079-1097), 25 (1098-1111), 25 (1111-1133)                                                                                                                                                |

**KIT** 1 (1-23), 2 (23-41), 2 (41-80), 2 (80-113), 3 (113-128), 3 (119-157), 3 (152-189), 3 (189-207), 4 (207-219), 4 (219-252), 5 (253-292), 5 (253-254), 5 (292-309), 6 (309-321), 6 (318-353), 6 (353-372), 7 (372-386), 7 (386-411), 8 (411-428), 8 (428-449), 9 (449-460), 9 (454-493), 9 (493-514), 10 (514-532), 10 (523-549), 11 (550-565), 11 (565-592), 12 (592-606), 12 (597-627), 13 (627-643), 13 (643-664), 14 (664-681), 14 (681-714), 15 (714-727), 15 (727-745), 16 (745-765), 16 (765-787), 17 (788-806), 17 (806-828), 18 (829-842), 18 (834-866), 19 (866-873), 19 (873-899), 20 (899-914), 20 (914-934), 21 (935-948), 21 (948-977)

**KRAS** 2 (1-26), 2 (26-37), 3 (38-43), 3 (43-87), 3 (81-97), 4 (97-135), 4 (135-150), 5 (151-180), 5 (180-189)

**MDM2** 1 (1-5), 2 (5-22), 2 (22-33), 3 (34-58), 4 (59-62), 4 (62-103), 5 (103-109), 5 (109-120), 7 (143-156), 7 (156-175), 8 (175-199), 8 (199-228), 9 (229-251), 9 (251-280), 10 (281-298), 10 (298-306), 11 (307-323), 11 (313-352), 11 (342-379), 11 (370-408), 11 (403-444), 11 (444-483), 11 (483-498)

**MLL** 2 (145-168), 3 (168-182), 3 (178-215), 3 (206-244), 3 (236-274), 3 (265-303), 3 (293-332), 3 (325-362), 3 (353-392), 3 (390-427), 3 (418-456), 3 (476-515), 3 (506-544), 3 (534-573), 3 (564-603), 3 (594-632), 3 (624-662), 3 (653-691), 3 (682-722), 3 (714-753), 3 (743-780), 3 (771-809), 3 (799-837), 3 (831-870), 3 (870-910), 3 (910-950), 3 (949-988), 3 (988-1029), 3 (1029-1052), 4 (1053-1064), 4 (1063-1103), 4 (1103-1112), 5 (1112-1129), 5 (1121-1161), 5 (1161-1190), 6 (1190-1212), 7 (1218-1257), 7 (1257-1296), 7 (1296-1338), 8 (1338-1362), 9 (1363-1381), 9 (1381-1406), 10 (1407-1422), 10 (1422-1444), 11 (1445-1458), 11 (1458-1493), 12 (1494-1507), 13 (1526-1566), 14 (1566-1578), 14 (1578-1604), 15 (1604-1617), 15 (1610-1647), 15 (1647-1665), 16 (1666-1691), 16 (1691-1723), 17 (1724-1737), 17 (1737-1760), 18 (1761-1774), 18 (1774-1785), 19 (1785-1805), 19 (1796-1836), 19 (1836-1850), 20 (1850-1866), 20 (1866-1885), 21 (1886-1907), 21 (1907-1931), 22 (1932-1943), 22 (1940-1979), 23 (1985-1999), 23 (1999-2024), 24 (2032-2050), 25 (2050-2063), 25 (2063-2104), 26 (2104-2114), 26 (2111-2151), 26 (2151-2166), 27 (2166-2186), 27 (2176-2214), 27 (2204-2244), 27 (2236-2274), 27 (2264-2303), 27 (2295-2334), 27 (2324-2362), 27 (2354-2392), 27 (2382-2422), 27 (2413-2451), 27 (2443-2480), 27 (2471-2511), 27 (2502-2542), 27 (2533-2570), 27 (2561-2600), 27 (2591-2629), 27 (2619-2660), 27 (2651-2690), 27 (2710-2747), 27 (2798-2836), 27 (2827-2864), 27 (2856-2894), 27 (2885-2924), 27 (2914-2953), 27 (2946-2983), 27 (2974-3012), 27 (3003-3041), 27 (3032-3072), 27 (3063-3102), 27 (3092-3131), 27 (3123-3161), 27 (3152-3190), 27 (3183-3222), 27 (3222-3261), 27 (3261-3300), 27 (3299-3338), 27 (3338-3376), 27 (3376-3414), 27 (3414-3454), 27 (3453-3492), 27 (3492-3530), 27 (3530-3570), 27 (3570-3582), 28 (3582-3609), 29 (3609-3631), 30 (3631-3645), 30 (3645-3688), 31 (3688-3713), 32 (3713-3729), 32 (3720-3758), 32 (3755-3771), 33 (3771-3775), 33 (3775-3807), 34 (3807-3810), 34 (3810-3835), 35 (3835-3852), 35 (3852-3878), 36 (3879-3891), 36 (3882-3921), 36 (3918-3958), 36 (3958-3970)

**MPL** 1 (1-17), 1 (7-27), 2 (27-61), 2 (61-71), 3 (71-88), 3 (81-122), 4 (131-147), 4 (146-189), 4 (189-230), 5 (231-246), 5 (246-285), 6 (285-303), 6 (303-327), 7 (327-346), 7 (336-375), 7 (370-389), 8 (389-396), 8 (396-436), 9 (455-490), 11 (522-551), 12 (552-566), 12 (559-600), 12 (600-636)

**MYD88** 1 (10-50), 1 (41-82), 1 (82-123), 2 (123-143), 2 (143-168), 3 (168-184), 3 (174-213), 3 (211-228), 4 (228-229), 4 (229-259), 5 (259-275), 5 (275-310)

**NOTCH1** 1 (1-21), 2 (21-47), 3 (47-88), 3 (88-128), 3 (120-135), 4 (197-237), 5 (248-266), 5 (266-289), 6 (318-357), 6 (350-367), 8 (419-443), 8 (434-475), 8 (466-481), 9 (481-504), 9 (504-519), 10 (519-538), 10 (538-557), 11 (632-635), 12 (635-650), 12 (650-672), 13 (716-736), 14 (736-770), 14 (770-785), 16 (823-847), 17 (863-885), 18 (914-940), 18 (940-981), 21 (1126-1166), 21 (1157-1170), 22 (1171-1196), 23 (1253-1294), 24 (1304-1338), 24 (1335-1338), 25 (1373-1413), 25 (1449-1491), 25 (1481-1523), 25 (1513-1529), 26 (1529-1549), 26 (1549-1591), 29 (1803-1824), 30 (1825-1843), 30 (1835-1874), 30 (1865-1880), 31 (1895-1935), 31 (1965-1978), 32 (2012-2028), 33 (2028-2052), 33 (2043-2060), 34 (2085-2131), 34 (2131-2170), 34 (2170-2210), 34 (2210-2251), 34 (2251-2293), 34 (2293-2335), 34 (2326-2364), 34 (2356-2398), 34 (2388-2430), 34 (2420-2460), 34 (2451-2489), 34 (2481-2521), 34 (2540-2556)

**NPM1** 1 (1-20), 2 (20-31), 2 (31-46), 3 (47-61), 3 (61-86), 4 (87-100), 4 (100-118), 5 (118-131), 5 (123-153), 6 (154-164), 6 (164-175), 7 (175-194), 8 (195-223), 9 (224-243), 9 (243-257), 10 (258-282), 11 (283-295)

**NRAS** 2 (1-21), 2 (21-37), 3 (77-97), 4 (97-134), 4 (134-150), 5 (151-169), 5 (169-190)

**PTPN11** 2 (5-7), 2 (7-46), 3 (46-60), 3 (54-92), 3 (92-111), 4 (111-134), 4 (134-175), 5 (176-196), 5 (196-214), 6 (215-240), 6 (240-252), 7 (253-268), 7 (268-285), 8 (285-299), 9 (312-317), 9 (317-355), 9 (355-364), 10 (365-377), 10 (377-408), 11 (409-423), 11 (423-460), 12 (460-483), 13 (483-496), 13 (496-533), 14 (534-564), 14 (564-571), 15 (571-594)

**RUNX1** 3 (20-31), 3 (31-33), 4 (62-101), 4 (97-117), 5 (118-142), 5 (142-170), 6 (170-187), 6 (187-205), 7 (205-249), 8 (269-310), 8 (310-323), 9 (323-354), 9 (354-397), 9 (396-435), 9 (460-481)

**TET2** 3 (1-22), 3 (13-52), 3 (44-82), 3 (73-112), 3 (103-140), 3 (132-171), 3 (162-200), 3 (191-229), 3 (220-259), 3 (250-288), 3 (279-318), 3 (308-347), 3 (337-376), 3 (369-408), 3 (399-439), 3 (429-468), 3 (459-498), 3 (488-527), 3 (518-557), 3 (549-586), 3 (577-616), 3 (636-674), 3 (665-704), 3 (694-732), 3 (723-762), 3 (752-790), 3 (783-823), 3 (823-860), 3 (859-896), 3 (896-935), 3 (935-975), 3 (975-1014), 3 (1013-1051), 3 (1051-1090), 3 (1090-1127), 3 (1127-1137), 4 (1137-1145), 4 (1145-1167), 5 (1167-1182), 5 (1182-1198), 6 (1199-1216), 6 (1207-1249), 6 (1249-1268), 7 (1268-1283), 7 (1283-1318), 8 (1319-1321), 8 (1321-1348), 9 (1349-1369), 9 (1369-1394), 10 (1395-1408), 10 (1399-1438), 10 (1432-1474), 10 (1474-1513), 11 (1513-1533), 11 (1523-1563), 11 (1555-1593), 11 (1585-1622),

|             |                                                                                                                                                                                                                             |
|-------------|-----------------------------------------------------------------------------------------------------------------------------------------------------------------------------------------------------------------------------|
|             | 11 (1612-1651), 11 (1643-1683), 11 (1674-1712), 11 (1703-1740), 11 (1736-1775), 11 (1774-1813), 11 (1813-1850), 11 (1850-1891), 11 (1890-1929), 11 (1929-1969), 11 (1969-2003)                                              |
| <b>TP53</b> | 4 (41-80), 4 (72-112), 4 (107-125), 5 (126-162), 5 (162-187), 6 (187-214), 6 (210-224), 7 (234-261), 8 (261-276), 8 (276-307), 9 (307-324), 9 (324-331), 10 (332-349), 10 (349-367)                                         |
| <b>WT1</b>  | 1 (25-63), 1 (163-204), 1 (197-216), 2 (216-240), 2 (240-257), 4 (291-304), 4 (304-317), 5 (317-334), 6 (334-352), 6 (352-366), 7 (367-400), 7 (400-417), 8 (417-433), 8 (433-447), 9 (477-478), 10 (478-505), 10 (505-518) |

### PCR-based next generation sequencing (NGS) 81-Gene panel

| <b>Gene</b>    | <b>Exons (codons) tested</b>                                                                 |
|----------------|----------------------------------------------------------------------------------------------|
| <b>ANKRD26</b> | 1 (1-6)                                                                                      |
| <b>ASXL1</b>   | 11-12 (362-1442), 12 (1450-1542)                                                             |
| <b>ASXL2</b>   | 11-12 (381-1436)                                                                             |
| <b>BCOR</b>    | 2-4 (1-511), 4-12 (515-1547), 13-15 (1550-1644), 15 (1663-1722)                              |
| <b>BCORL1</b>  | 1-6 (1-1261), 6 (1292-1323), 6-12 (1326-1700), 12 (1706-1712)                                |
| <b>BRAF</b>    | 11 (439-478), 15 (581-620)                                                                   |
| <b>BRINP3</b>  | 2-8 (1-767)                                                                                  |
| <b>CALR</b>    | 9 (352-418)                                                                                  |
| <b>CBL</b>     | 7-9 (336-477)                                                                                |
| <b>CBLB</b>    | 7-10 (282-469)                                                                               |
| <b>CBLC</b>    | 7-9 (336-454), 10 (465-475)                                                                  |
| <b>CEBPA</b>   | 1 (1-90), 1 (249-358), 1 (128-175), 1 (178-201)                                              |
| <b>CREBBP</b>  | 1-8 (1-608), 9-30 (615-1724), 31 (2238-2443), 31 (2049-2235), 31 (1725-1943), 31 (1950-2042) |
| <b>CRLF2</b>   | 6 (217-256)                                                                                  |
| <b>CSF3R</b>   | 14 (575-622), 17 (681-800), 17 (822-864)                                                     |
| <b>CUX1</b>    | 2-6 (11-172), 6-9 (174-241), 10-14 (248-408)                                                 |
| <b>DDX41</b>   | 1-11 (1-410), 12 (416-418), 12-17 (420-623)                                                  |
| <b>DNMT3A</b>  | 8-22 (286-862), 23 (866-913)                                                                 |
| <b>EED</b>     | 1-2 (1-69), 2-8 (71-287), 9-12 (289-442)                                                     |
| <b>ELANE</b>   | 1-2 (1-48), 2 (69-75), 4-5 (123-268)                                                         |
| <b>ETNK1</b>   | 3 (228-275)                                                                                  |
| <b>ETV6</b>    | 1-8 (1-453)                                                                                  |
| <b>EZH2</b>    | 2-5 (1-158), 5-6 (160-205), 7 (209-217), 8-19 (243-732), 20 (752)                            |
| <b>FBXW7</b>   | 9-12 (413-708)                                                                               |
| <b>FLT3</b>    | 11-20 (437-847)                                                                              |
| <b>GATA1</b>   | 2-3 (1-84)                                                                                   |
| <b>GATA2</b>   | 2 (2-5), 2-5 (22-377), 5-6 (379-481)                                                         |
| <b>GFI1</b>    | 2 (2-39)                                                                                     |
| <b>GNAS</b>    | 8 (200-202), 11 (315-324)                                                                    |
| <b>HNRNPK</b>  | 3-17 (1-465)                                                                                 |
| <b>HRAS</b>    | 2-3 (1-59), 3-4 (87-135), 4 (137-150)                                                        |
| <b>IDH1</b>    | 4 (132-133)                                                                                  |
| <b>IDH2</b>    | 4 (125-178)                                                                                  |
| <b>IKZF1</b>   | 2-8 (1-443), 8 (445-518)                                                                     |
| <b>IL2RG</b>   | 1-2 (1-45), 2-8 (51-340), 8 (352-370)                                                        |
| <b>IL7R</b>    | 5-7 (180-292)                                                                                |
| <b>JAK1</b>    | 3-22 (3-1023), 22-24 (1026-1123)                                                             |
| <b>JAK2</b>    | 10 (405-442), 12-14 (505-622), 16 (665-711), 18 (762-812)                                    |

**JAK3** 2-23 (1-1069)  
**KDM6A** 1-29 (1-1402)  
**KIT** 8-9 (411-514), 11 (550-592), 17 (788-828)  
**KMT2A** 2 (145-168), 3-4 (176-1075), 4 (1081-1112), 5 (1117-1184), 6 (1190-1212), 7 (1224-1325),  
8-13 (1338-1560), 14-15 (1566-1665),  
27 (2186-2195), 27 (2201-2355), 27 (2373-3215), 27 (3223-3324), 27 (3339-3575)  
**KRAS** 2-4 (1-150)  
**MAP2K1** 2 (27-90), 3 (98-146)  
**MPL** 10 (490-522), 12 (552-636)  
**NF1** 2-5 (21-189), 6 (201-218), 8-13 (244-467), 13-24 (478-1066), 25-26 (1082-1146),  
26-31 (1160-1378), 31-35 (1380-1550), 35-38 (1564-1868),  
39 (1870-1884), 39-47 (1886-2322), 47-52 (2325-2555), 52-58 (2568-2840)  
**NOTCH1** 26-28 (1529-1795), 34 (2069-2273), 34 (2290-2556), 34 (2069-2273), 34 (2290-2556)  
**NPM1** 11 (283-295)  
**NRAS** 2-4 (1-150)  
**PAX5** 1-10 (14-392)  
**PHF6** 2-10 (1-366)  
**PIGA** 2 (1-6), 2-6 (16-485)  
**PML** 3 (201-255)  
**PRPF40B** 2-19 (2-609), 19-20 (611-658), 20-26 (661-893)  
**PTEN** 7-8 (212-285), 8 (290-342)  
**PTPN11** 3-4 (46-125), 7 (253-285), 12 (460-462), 12-13 (465-533)  
**RAD21** 2-14 (1-632)  
**RARA** 6-7 (211-338)  
**RUNX1** 2-9 (1-437), 9 (456-474)  
**SETBP1** 4 (838-885)  
**SF1** 1-13 (1-640)  
**SF3A1** 1-7 (1-322), 7-9 (328-424), 9-16 (427-794)  
**SF3B1** 13-16 (574-790)  
**SH2B3** 2 (1-118), 2 (132-164), 2-8 (211-576)  
**SMC1A** 1-19 (1-983), 20-25 (992-1234)  
**SMC3** 1-6 (1-110), 6-16 (113-504), 16-17 (507-580), 17-29 (591-1217)  
**SRSF2** 1 (1-38), 1 (45-121)  
**STAG1** 2 (1-5), 3-20 (10-703), 21-22 (718-738), 22-27 (740-953), 27-34 (955-1259)  
**STAG2** 2-15 (1-512), 16-33 (521-1232)  
**STAT3** 17 (521-534), 17 (489-503), 17 (506-508), 18-22 (534-715)  
**STAT5A** 3-7 (1-214), 8-9 (264-286), 9-20 (303-795)  
**STAT5B** 16 (636-693)  
**SUZ12** 1-2 (20-107), 4-5 (129-169), 7-16 (198-740)  
**TERT** 1 (1-24), 2 (80-172), 2-4 (258-630), 4-5 (633-677), 5-6 (683-749), 6-8 (753-800), 8-16 (805-1133)  
**TET2** 3 (1-77), 3 (91-826), 3 (829-853), 3-11 (867-2003)  
**TP53** 2 (1-25), 4-11 (80-394)  
**U2AF1** 2 (15-44), 6 (117-161)  
**U2AF2** 1-5 (1-161), 6-12 (163-473)  
**WT1** 1 (122-216), 1 (2-44), 1 (56-58), 2-10 (216-518)  
**ZRSR2** 1-4 (1-90), 5 (108-131), 6-9 (134-263), 9-11 (267-483)

Table S1. Characteristics of Individual patients with *NPM1mut* MDS and MDS/MPN

| UPN | Age | WHO 2016 Subtype | BM Blast% | Karyotype                                                                                                              | IPSS-R | <i>NPM1<sup>mut</sup></i> VAF | Other mutations                                                   | Initial Therapy          | Response | Transplant | OS (months) |
|-----|-----|------------------|-----------|------------------------------------------------------------------------------------------------------------------------|--------|-------------------------------|-------------------------------------------------------------------|--------------------------|----------|------------|-------------|
| 1   | 33  | MDS-EB           | 10        | 46,XX[20]                                                                                                              | H      | 0.41                          | -                                                                 | Decitabine               | HI       | Yes        | 106         |
| 2   | 62  | MDS-EB           | 12        | 46,XX,del(9)(q13q22)[9]; 46,XX[11]                                                                                     | H      | 0.405                         | <i>PTPN11 S502L</i>                                               | Azacitidine+Lenalidomide | Died     | No         | 2           |
| 3   | 80  | CMML             | 6         | 46,XY[20]                                                                                                              | Int    | 0.143                         | -                                                                 | Azacitidine+Vorinostat   | mCR+HI   | No         | 5           |
| 4   | 85  | MDS-EB           | 15        | 46,XY[20]                                                                                                              | Int    | 0.1703                        | <i>IDH2 R140Q</i>                                                 | Azacitidine+Rigosertib   | CR       | No         | 22          |
| 5   | 47  | MDS-EB           | 8         | 46,XX,del(9)(q13q22)[20]                                                                                               | H      | 0.4184                        | <i>NRAS G13R, PTPN11 G503R, PTPN11 A72T, WT1 L378fs, FLT3 ITD</i> | Azacitidine+Rigosertib   | mCR      | Yes        | 40          |
| 6   | 56  | MDS-EB           | 6         | 47,XY,+21[1]/46,XY[19]                                                                                                 | H      | 0.4411                        | <i>FLT3 D835</i>                                                  | Decitabine               | HI       | No         | 7           |
| 7   | 65  | MDS-EB           | 10        | 46,XY[20]                                                                                                              | H      | 0.2384                        | -                                                                 | Azacitidine              | mCR      | No         | 7           |
| 8   | 86  | MDS-EB           | 16        | 46,XY[20]                                                                                                              | Int    | 0.35                          | -                                                                 | Azacitidine              | CR       | No         | 58          |
| 9   | 77  | MDSdel5q         | 4         | 46,XY,del(5q)[7],46,XY[13]                                                                                             | Int    | 0.09                          | -                                                                 | Lenalidomide             | HI       | No         | 19          |
| 10  | 44  | MDS-EB           | 10        | 46,XX[20]                                                                                                              | Int    | 0.36                          | -                                                                 | IAx1 and BIDFAx4         | CR       | No         | 14          |
| 11  | 35  | MDS-EB           | 17        | 46,XY[20]                                                                                                              | VH     | 0.48                          | <i>NRAS G12D</i>                                                  | IA+Vorinostat            | CR       | Yes        | 91          |
| 12  | 19  | MDS-EB           | 8         | 46,XX[20]                                                                                                              | Int    | 0.43                          | <i>NRAS G12D</i>                                                  | ADE                      | CR       | Yes        | 9           |
| 13  | 58  | MDS-EB           | 17        | 46,XX[20]                                                                                                              | H      | 0.42                          | <i>IDH1 R132H</i>                                                 | Azacitidine              | PR       | Yes        | 83          |
| 14  | 60  | MDS-EB           | 2         | 46,XY[20]                                                                                                              | Int    | 0.48                          | <i>NRAS G13D, FLT3-ITD</i>                                        | Decitabine               | PD       | No         | 10          |
| 15  | 55  | MDS-EB           | 15        | 46,XY[20]                                                                                                              | VH     | 0.17                          | -                                                                 | FIA                      | CR       | Yes        | 60          |
| 16  | 66  | T-MDS            | 0         | 48,XY,+8,+8,dup(13)(q12q34)[2]<br>48,XY,add(2)(q37),+8,+8[4]/48,XY,+8,+8,add(15)(q26)[2] 48,XY,+8,+8[cp2]<br>46,XY[10] | VH     | 0.4475                        | <i>DNMT3A R882H, TET2 R1951W</i>                                  | Guadecitabine            | CR       | No         | 34          |
| 17  | 75  | MDS-EB           | 7         | 46,XY[20]                                                                                                              | H      | 0.3366                        | -                                                                 | Azacitidine              | NE       | No         | 0           |
| 18  | 43  | MDS-EB           | 15        | 46,XX[20]                                                                                                              | H      | 0.4363                        | <i>DNMT3A S352fs, NRAS G12D</i>                                   | FIA                      | CR       | No         | 24          |
| 19  | 51  | T-MDS            | 2         | 46,XX[20]                                                                                                              | Int    | 0.4939                        | <i>DNMT3A R635W</i>                                               | Decitabine               | PD       | Yes        | 16          |
| 20  | 62  | MDS-EB           | 6         | 46,XY[20]                                                                                                              | H      | 0.401                         | <i>WT1 C428fs</i>                                                 | Azacitidine              | mCR+HI   | No         | 2           |



|    |    |         |    |                               |     |        |                                                                        |                         |     |     |    |
|----|----|---------|----|-------------------------------|-----|--------|------------------------------------------------------------------------|-------------------------|-----|-----|----|
| 21 | 39 | CMML    | 7  | 46,XY[20]                     | Int | 0.4192 | <i>DNMT3A F752L, NRAS G12D, WT1 Q422*</i>                              | Azacitidine + Nivolumab | mCR | Yes | 30 |
| 22 | 68 | MDS-EB  | 19 | 46,XX[20]                     | VH  | 0.1404 | <i>KRAS G12S, TET2 Q649*, TET2 C470*, TET2 E887*, RUNX1 F336fs*625</i> | BIDFA                   | mCR | Yes | 30 |
| 23 | 48 | MDS/MPN | 13 | 46,XX[20]                     | Int | 0.33   | <i>NRAS G12D, TET2 C1378Y</i>                                          | CLIA                    | CR  | Yes | 24 |
| 24 | 63 | CMML    | 15 | 47,XX,+21[16]/46,XX[4]        | H   | 0.382  | <i>NRAS G12D</i>                                                       | Azacitidine             | PR  | No  | 26 |
| 25 | 66 | CMML    | 16 | 46,XY[20]                     | Int | 0.2776 | <i>TP53 E358V, IDH2 R140Q, DNMT3A R882H</i>                            | Decitabine              | CR  | Yes | 12 |
| 26 | 73 | MDS/MPN | 15 | 46,XX[20]                     | VH  | 0.355  | <i>SF3B1 G740E, DNMT3A R771*, DNMT3A R320*</i>                         | Azacitidine+Ruxolitinib | mCR | No  | 6  |
| 27 | 71 | MDS/MPN | 4  | 46,XX,del(20)(q11.2q13.3)[20] | H   | 0.382  | <i>RUNX1 R166*, ASXL1 G646fs</i>                                       | BuFlu                   | CR  | Yes | 22 |
| 28 | 78 | CMML    | 4  | 46,XY[20]                     | Int | 0.526  | <i>NRAS G12D, PTPN11 N308D</i>                                         | Decitabine              | PD  | No  | 14 |
| 29 | 79 | MDS-EB  | 11 | 46,XY[20]                     | VH  | 0.4481 | -                                                                      | Guadecitabine           | CR  | No  | 7  |
| 30 | 59 | MDS-EB  | 18 | 46,XX[20]                     | H   | 0.443  | <i>NRAS G12D, WT1 R380fs</i>                                           | CLIA                    | CR  | No  | 18 |
| 31 | 63 | CMML    | 10 | 46,XX,inv(9)(p12q13)[20]      | Int | 0.3295 | <i>TET2 Y1255*</i>                                                     | CLIA                    | CR  | Yes | 10 |

MDS-EB: MDS with excess blasts. CMML: chronic myelomonocytic leukemia. MDS/MPN-U: MDS/MPN unclassifiable. T-MDS: Therapy related MDS.. CR: complete response. mCR: marrow complete response. PR: partial response. HI: Hematological improvement. NR: No response. PD: progressive disease. NE: Not evaluable. ADE: Cytarabine, daunorubicine, etoposide. IA: Idarubicin and cytarabine. CLIA: Cladribine, idarubicin and cytarabine. FIA: Fludarabine, idarubicin, cytarabine. BuFlu: Busulphan, fludarabine.

**Table S2. Characteristics of Patients with *NPM1*<sub>mut</sub> compared to *NPM1*<sub>wt</sub> MDS and MDS/MPN**

| Variable                        | <i>NPM1</i> <sub>mut</sub> MDS (n=31)<br>n (%) /mean[SD] | <i>NPM1</i> <sub>wt</sub> MDS (n=558)<br>n (%) /mean[SD] | p value |
|---------------------------------|----------------------------------------------------------|----------------------------------------------------------|---------|
| Median age (years)              | 62 [19-86]                                               | 69 [22-93]                                               | <0.001  |
| Male                            | 14 (45)                                                  | 371 (67)                                                 | 0.020   |
| Hgb (g/dL)                      | 8.7 [8.2-9.2]                                            | 9.9 [9.7-10.1]                                           | 0.001   |
| WBC (x10 <sup>9</sup> /L)       | 7.9 [4.5-11.3]                                           | 7.9 [6.5-9.3]                                            | 0.996   |
| Platelets (x10 <sup>9</sup> /L) | 85 [63-107]                                              | 117 [109-126]                                            | 0.076   |
| ANC (x10 <sup>9</sup> /L)       | 2.9 [0.5-5.2]                                            | 3.9 [0.738]                                              | 0.716   |
| Median bone marrow blasts %     | 10 [0-19]                                                | 5 [0-19]                                                 | <0.001  |
| <b>WHO Diagnosis</b>            |                                                          |                                                          | <0.001  |
| MDS-SLD                         | 1* (4)                                                   | 38 (7)                                                   |         |
| MDS-RS                          | 0 (0)                                                    | 57 (10)                                                  |         |
| MDS-MLD                         | 1* (4)                                                   | 127 (23)                                                 |         |
| MDS-EB                          | 19 ( )                                                   | 196 (35)                                                 |         |
| MDS-U                           | 0 (0)                                                    | 25 (5)                                                   |         |
| MDS/MPN-U                       | 3 ( )                                                    | 6 (1)                                                    |         |
| CMML                            | 6 ( )                                                    | 109 (20)                                                 |         |
| MDS del(5q)                     | 1 ( )                                                    | 0 (0)                                                    |         |
| <b>IPSS-R</b>                   |                                                          |                                                          | <0.001  |
| Very Low                        | 0 (0)                                                    | 50 (9)                                                   |         |
| Low                             | 0 (0)                                                    | 151 (27)                                                 |         |
| Intermediate                    | 13 (42)                                                  | 125 (22)                                                 |         |
| High                            | 12 (39)                                                  | 105 (19)                                                 |         |
| Very high                       | 6 (19)                                                   | 127 (23)                                                 |         |

\* Also classifiable as therapy-related MDS.

MDS-EB: MDS with excess blasts. CMML: chronic myelomonocytic leukemia. MDS/MPN-U:

MDS/MPN unclassifiable. MDS-MLD: MDS with multilineage dysplasia. MDS-SLD: MDS with single lineage dysplasia.

**Table S3. Univariate analysis for survival based on mutations.** Only genes with mutations present in at least 3 patients were included in the analysis to prevent bias associated with small patient numbers. Survival impact calculated by Cox regression univariate analysis.

| Gene                    | Frequency  | Overall Survival  |         | Time to transformation |         |
|-------------------------|------------|-------------------|---------|------------------------|---------|
|                         |            | HR [95% CI]       | p value | HR [95% CI]            | p value |
| <i>DNMT3A</i>           | 6/22 (19)  | 0.36 [0.08-1.66]  | 0.191   | 0.81 [0.20-3.27]       | 0.766   |
| <i>FLT3</i>             | 3/31 (10)  | 1.71 [0.38-7.71]  | 0.485   | 0.41 [0.00-159.25]     | 0.448   |
| <i>NRAS</i>             | 10/31 (32) | 0.39 [0.11-1.41]  | 0.153   | 0.79 [0.24-2.63]       | 0.703   |
| <i>PTPN11</i>           | 3/22 (10)  | 1.19 [0.26-5.51]  | 0.822   | 0.83 [0.10-6.67]       | 0.862   |
| <i>TET2</i>             | 4/19 (13)  | 0.25 [0.03-2.04]  | 0.195   | 0.91 [0.18-4.53]       | 0.909   |
| <i>WT1</i>              | 4/22 (13)  | 0.03 [0.00-8.09]  | 0.217   | 0.99 [0.20-4.79]       | 0.988   |
| <i>NPM1 VAF &lt;20%</i> | 5/31 (16)  | 0.66 [0.21-2.08]  | 0.481   | 1.05 [0.23-4.79]       | 0.953   |
| <i>NPM1 subclonal</i>   | 3/16 (10)  | 0.462 [0.11-1.95] | 0.293   | 0.97 [0.11-8.43]       | 0.979   |

**Figure S1. Changes in bone marrow blast percentages between pre-treatment bone marrow aspirations.** X axis represents time in days from initial bone marrow (time point 0) to second bone marrow aspiration prior to starting therapy. Dots represent pre-treatment blast percentage for each given patient.

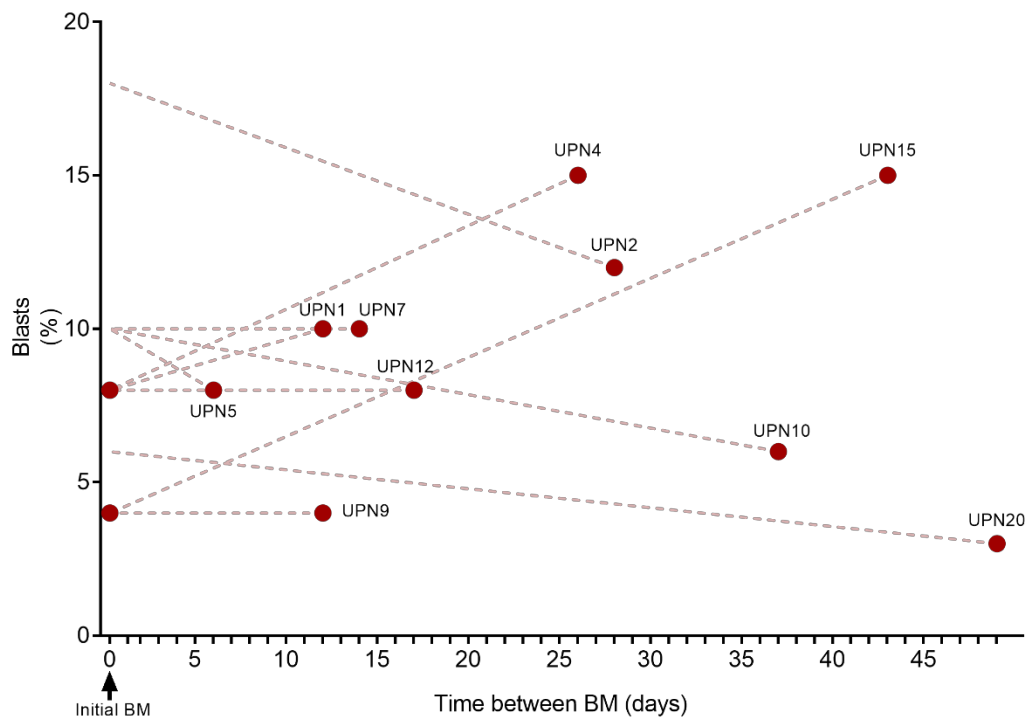

Figure S2. Kaplan-Meier estimate curve for overall survival of patients with *NPM1* mutant MDS.

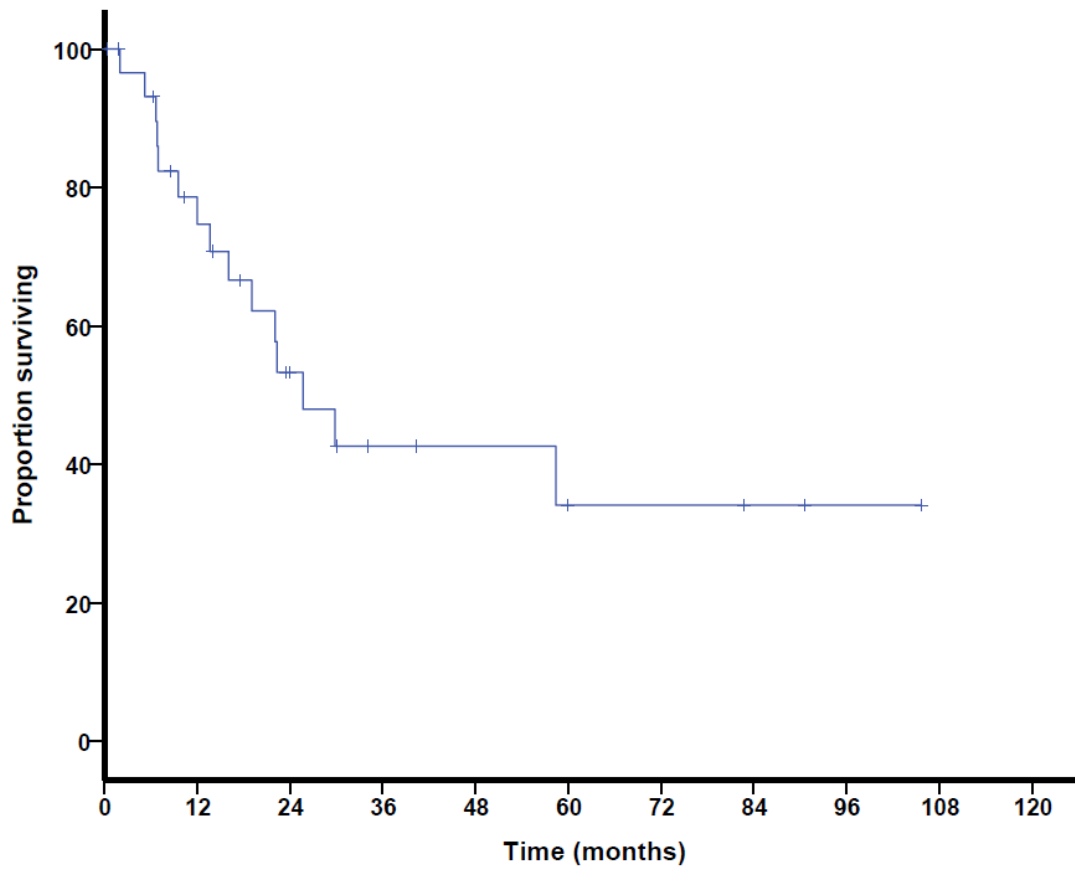

Figure S3. Kaplan-Meier estimate curves for progression-free survival in patients with *NPM1* mutant MDS

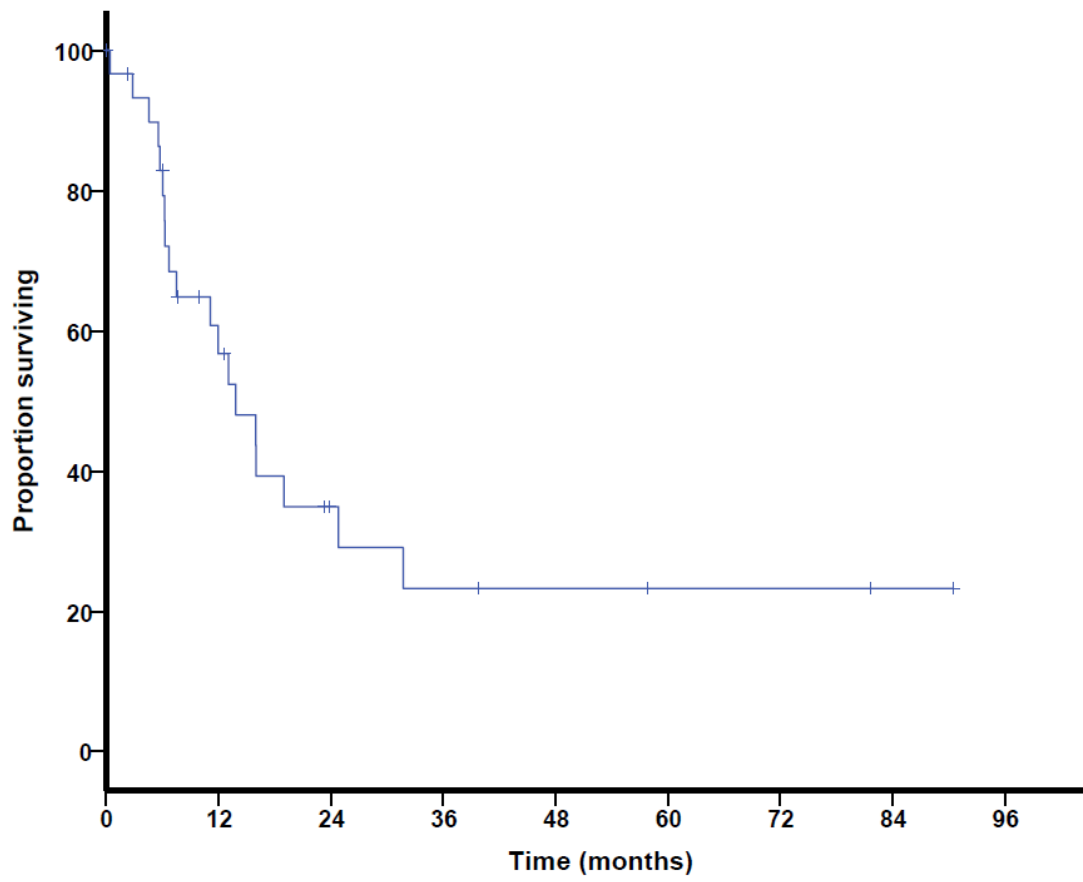

**Figure S4. Morphologic and immunophenotypic features of *NPM1* mutated MDS and MDS/MPN.** A) Bone marrow image shows a hypercellular bone marrow with dysmegakaryopoiesis as observed by the presence of megakaryocytes with hypolobated and dispersed nuclei (arrow). B) Bone marrow aspirate images show marked dyserythropoiesis with intercytoplasmic bridging (arrow), nuclear picnosis and abnormal hemoglobin (star) and abnormal segmentation and chromatin compaction (cross). C) Bone marrow progenitor cell distribution by 6 color multiparametric flow cytometry evaluating CD123 and CD45RA expression profile among the CD34+/CD38+ compartment of a representative patient. Capture shows a GMP pattern of differentiation characterized by increased frequency of GMP population and a sharp decrease in the number of MEPs. CMP = Common myeloid progenitor. MEP = Megakaryocytic-erythroid progenitor. GMP = Granulo-monocytic progenitor.

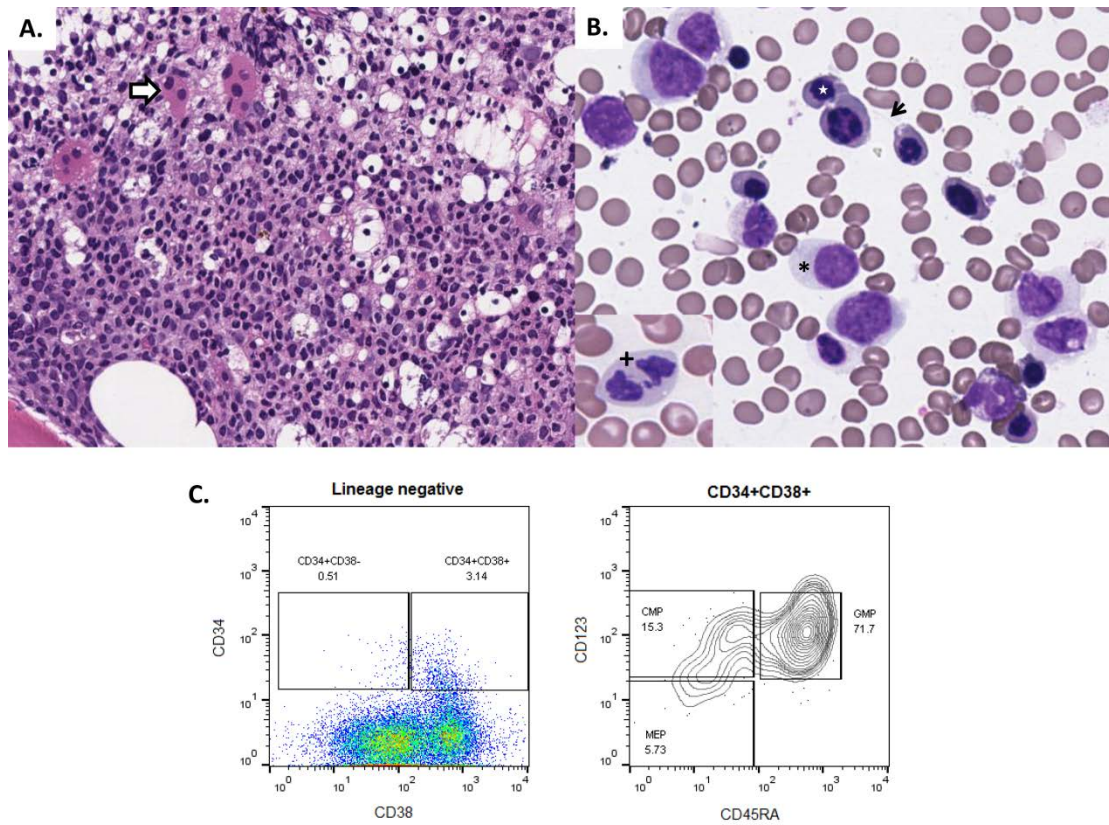

Figure S5. Kaplan-Meier estimates for time to transformation based on therapy in patients with *NPM1* mutated MDS or MDS/MPN.

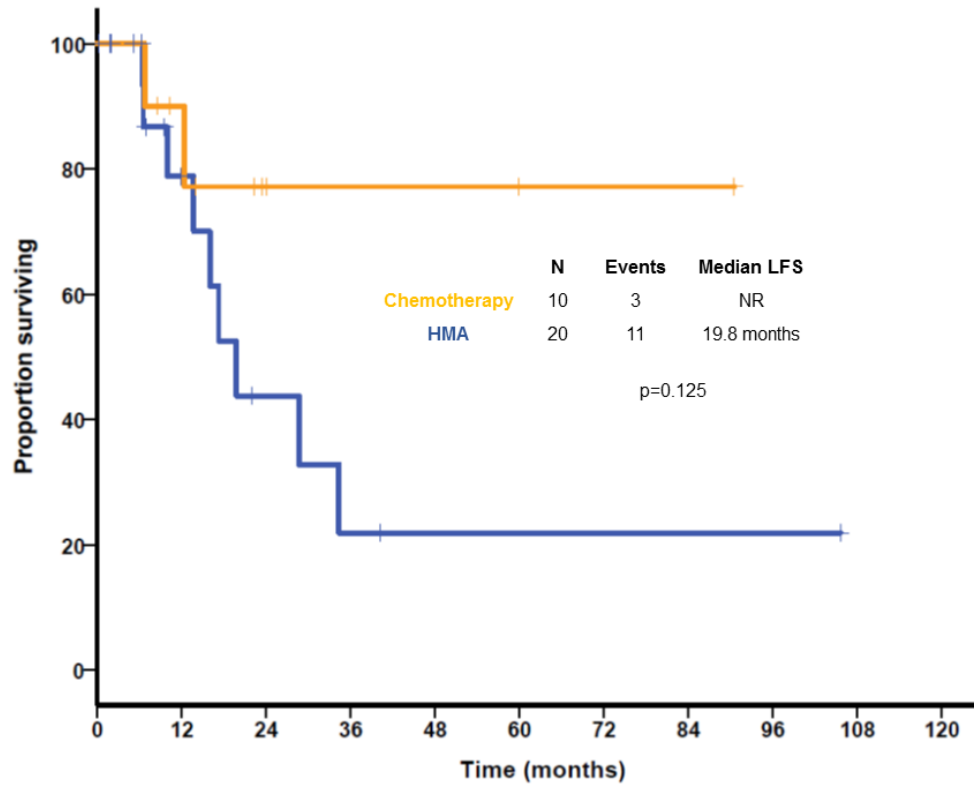



Figure S6. Kaplan-Meier estimates for overall-free survival based on IPSS-R in patients with *NPM1* mutated MDS or MDS/MPN.

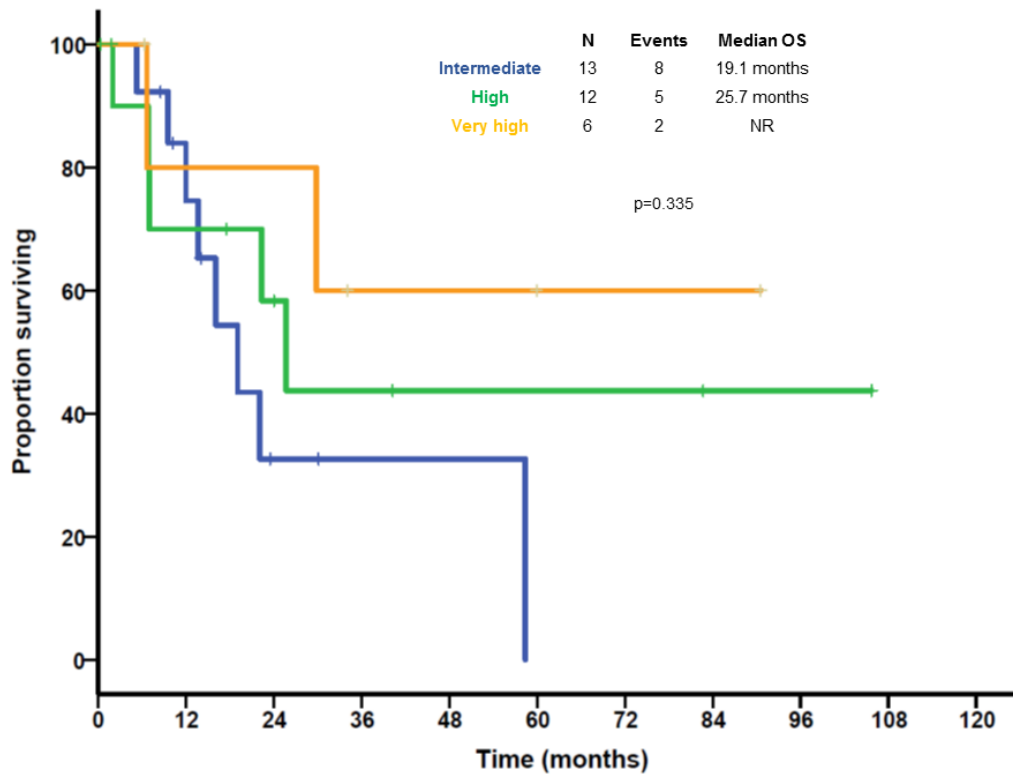

Figure S7. Kaplan-Meier estimates for time to transformation based on IPSS-R in patients with *NPM1* mutated MDS or MDS/MPN.

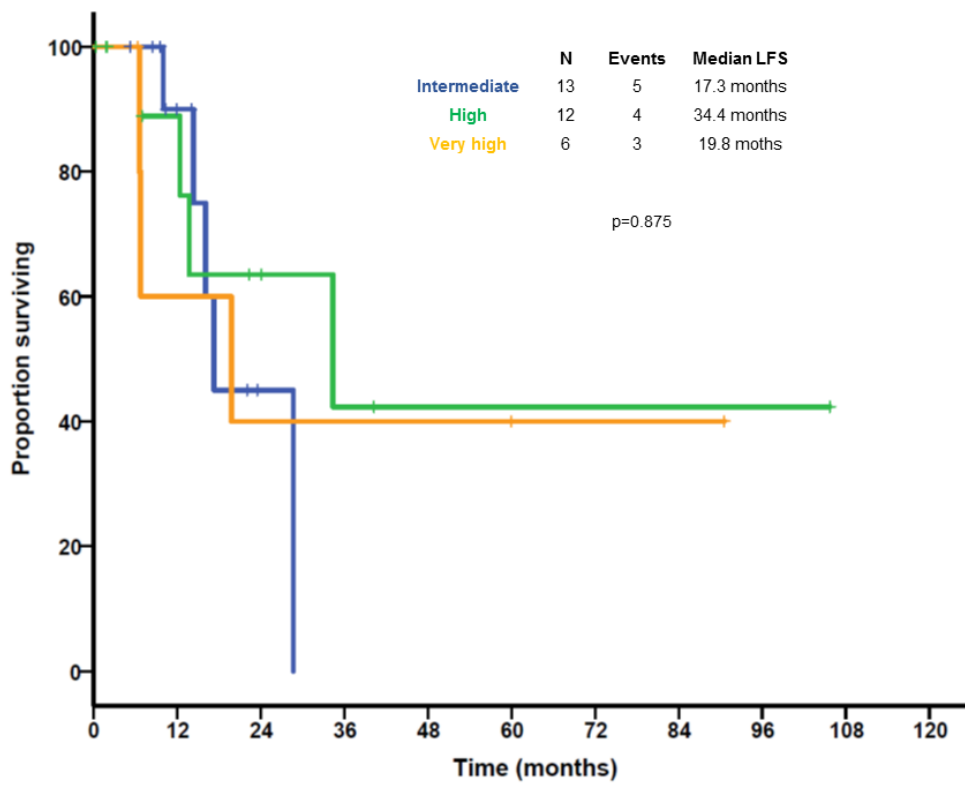

Supplement: ba026989-suppl1.pdf [file ba026989-suppl1.pdf]
